# Supplementary material for: Exercise-Based Real-time Telerehabilitation for Older Adult Patients Recently Discharged After Transcatheter Aortic Valve Implantation: Mixed Methods Feasibility Study
Source: PubMed Central journal article supplement (PMC9092235; doi:10.2196/34819), 2022-04-26
Supplement: rehab_v9i2e34819_app3.pdf [file rehab_v9i2e34819_app3.pdf]

| <p>Preparation and preliminary questions<br/> Thank you for participating in this interview (repeat that it is voluntary, obtain signed consent, provide a copy to the participant).<br/> I will ask you a series of questions. Try to put as many of your thoughts and considerations into words.</p> |                                                                                                                                                                                                                                                                                                         |                                                                                                                                                                                                                                                                                                                                                                          |
|--------------------------------------------------------------------------------------------------------------------------------------------------------------------------------------------------------------------------------------------------------------------------------------------------------|---------------------------------------------------------------------------------------------------------------------------------------------------------------------------------------------------------------------------------------------------------------------------------------------------------|--------------------------------------------------------------------------------------------------------------------------------------------------------------------------------------------------------------------------------------------------------------------------------------------------------------------------------------------------------------------------|
| Themes                                                                                                                                                                                                                                                                                                 | Main questions                                                                                                                                                                                                                                                                                          | Sub questions                                                                                                                                                                                                                                                                                                                                                            |
| Situation after hospital discharge                                                                                                                                                                                                                                                                     | <p>Tell me about the information you got on the project before you were discharged from the hospital.</p> <p>How did you experience the time after you came home from the hospital?</p> <p>Have you participated in other types of training?</p>                                                        | <p>Was the information easy to understand/to manage? Explain</p> <p>Did you feel ready to come home then?</p> <p>Training in elderly activity center/ municipality</p>                                                                                                                                                                                                   |
| Training and exercises                                                                                                                                                                                                                                                                                 | <p>What has the home training meant to you?</p> <p>Does this way of training motivate you?</p> <p>Was the training program on paper easy to follow?</p>                                                                                                                                                 | <p>Was it practical, easy, difficult, unmanageable? Explain</p> <p>How did you experience training with the step bench, training mat, dumb bells?</p> <p>Was the program on paper helpful? How?</p>                                                                                                                                                                      |
| Tablet (instruction and information)                                                                                                                                                                                                                                                                   | <p>How did you experience using the tablet?</p> <p>How did you experience the training via tablet?</p> <p>What do you think of the information on the website?</p> <p>What did the conversation with the nurse mean to you?</p> <p>Does using the tablet motivate you?</p>                              | <p>Was it easy, difficult, practical, or was print too small?</p> <p>How much have you used the tablet? Watched the videos, read the material?</p> <p>Have you used the tablet to show others what the surgery was about? (social relations, manageable, comprehensible, meaningful)</p> <p>Have you used a tablet before? Do you use PC and email in everyday life?</p> |
| Activity tracker                                                                                                                                                                                                                                                                                       | <p>What did you think of the activity tracker?</p> <p>What has it meant to you to use the activity tracker?</p> <p>Does using the activity tracker motivate you?</p>                                                                                                                                    | <p>Easy to wear/use/cumbersome, bother your wrist? Explain</p> <p>Have you become more motivated to take a walk?</p>                                                                                                                                                                                                                                                     |
| Overall                                                                                                                                                                                                                                                                                                | <p>Can you briefly tell us what it has meant to you to train online and interact with us at the hospital in this way?</p>                                                                                                                                                                               |                                                                                                                                                                                                                                                                                                                                                                          |
| Improvements                                                                                                                                                                                                                                                                                           | <p>Is there anything you have been missing? (information?)</p> <p>What could we have done differently?</p> <p>What do you think could make others participate in training via tablet in the future?</p> <p>What do you think could be a barrier for others to participate in this form of training?</p> |                                                                                                                                                                                                                                                                                                                                                                          |
| <p><b>Debriefing:</b> I have no more questions. Do you have more you'd like to say, ask for, or add before we end? Thanks for your participation</p>                                                                                                                                                   |                                                                                                                                                                                                                                                                                                         |                                                                                                                                                                                                                                                                                                                                                                          |
